# Supplementary material for: Long working hours, anthropometry, lung function, blood pressure and blood-based biomarkers: cross-sectional findings from the CONSTANCES study
Source: PubMed Central journal article supplement — J Epidemiol Community Health. 2018 Oct 16;73(2):130–5. doi: 10.1136/jech-2018-210943 (PMC6352398; doi:10.1136/jech-2018-210943), 2018-10-16
Supplement: jech-2018-210943supp001.pdf [file jech-2018-210943supp001.pdf]

**Supplementary Table 1.** Multivariable-adjusted odds ratios (OR) and 95% confidence intervals (CI) for current exposure to long working hours by sociodemographic and health-related characteristics of the participants

| <b>Characteristic</b>                             | <b>OR (95% CI) of<br/>current versus never<br/>working long hours</b> |
|---------------------------------------------------|-----------------------------------------------------------------------|
| Age: >50 vs ≤50 years                             | 0.41 (0.39-0.43)                                                      |
| Sex: men vs women                                 | 1.86 (1.77-1.95)                                                      |
| Socioeconomic position: intermediate vs low       | 1.35 (1.26-1.44)                                                      |
| high vs low                                       | 3.63 (3.42-3.85)                                                      |
| other/not specified vs low                        | 1.62 (1.45-1.81)                                                      |
| Smoking: former vs never                          | 1.08 (1.02-1.15)                                                      |
| current vs never                                  | 1.27 (1.20-1.35)                                                      |
| Alcohol use: no abuse/dependence vs abstinence    | 1.09 (0.94-1.25)                                                      |
| abuse vs abstinence                               | 1.35 (1.16-1.57)                                                      |
| dependence vs abstinence                          | 1.29 (1.09-1.52)                                                      |
| Physical activity (sports): ≥2 hours/week vs less | 0.86 (0.82-0.90)                                                      |
| Depressive symptoms: yes vs no                    | 1.11 (1.05-1.18)                                                      |
| Chronic somatic disease: yes vs no                | 0.93 (0.88-0.98)                                                      |
