# Supplementary material for: Long working hours, anthropometry, lung function, blood pressure and blood-based biomarkers: cross-sectional findings from the CONSTANCES study
Source: PubMed Central journal article supplement — J Epidemiol Community Health. 2018 Oct 16;73(2):130–5. doi: 10.1136/jech-2018-210943 (PMC6352398; doi:10.1136/jech-2018-210943), 2018-10-16
Supplement: jech-2018-210943supp003.pdf [file jech-2018-210943supp003.pdf]

**Supplementary Table 3.** Working hours and mean difference in clinical risk markers (standardized values) among female participants (max n=39 499), adjusted for age, socioeconomic position, smoking, alcohol use, physical activity, depressive symptoms, and chronic disease

|                                | <i>Body mass index (BMI)</i> | <i>Waist circumference</i> | <i>Waist-hip ratio</i>                 | <i>Forced volume vital capacity (FVC)</i> | <i>Forced expiratory volume (FEV)</i> | <i>Systolic blood pressure</i> | <i>Diastolic blood pressure</i>              | <i>Pulse pressure</i>             |
|--------------------------------|------------------------------|----------------------------|----------------------------------------|-------------------------------------------|---------------------------------------|--------------------------------|----------------------------------------------|-----------------------------------|
| Exposure to long working hours | Mean (95% CI)                | Mean (95% CI)              | Mean (95% CI)                          | Mean (95% CI)                             | Mean (95% CI)                         | Mean (95% CI)                  | Mean (95% CI)                                | Mean (95% CI)                     |
| Timing of exposure             |                              |                            |                                        |                                           |                                       |                                |                                              |                                   |
| Never                          | 1.00                         | 1.00                       | 1.00                                   | 1.00                                      | 1.00                                  | 1.00                           | 1.00                                         | 1.00                              |
| Former                         | 0.07 (0.04-0.10)             | 0.07 (0.04-0.10)           | 0.04 (0.02-0.06)                       | -0.01 (-0.03-0.01)                        | -0.02 (-0.04-0.00)                    | -0.03 (-0.06-0.00)             | -0.03 (-0.06-0.00)                           | -0.01 (-0.04-0.02)                |
| Current                        | 0.05 (0.01-0.09)             | 0.00 (-0.03-0.03)          | -0.04 (-0.07--0.02)                    | 0.00 (-0.02-0.02)                         | -0.01 (-0.03-0.01)                    | -0.02 (-0.05-0.01)             | -0.01 (-0.04-0.02)                           | -0.01 (-0.04-0.02)                |
|                                | <i>Total cholesterol</i>     | <i>Triglycerides</i>       | <i>High-density lipoproteins (HDL)</i> | <i>Low-density lipoprotein (LDL)</i>      | <i>Glucose</i>                        | <i>Creatinine</i>              | <i>Gamma-glutamyl-transferase (Gamma GT)</i> | <i>Alanine transaminase (ALT)</i> |
|                                | Mean (95% CI)                | Mean (95% CI)              | Mean (95% CI)                          | Mean (95% CI)                             | Mean (95% CI)                         | Mean (95% CI)                  | Mean (95% CI)                                | Mean (95% CI)                     |
| Timing of exposure             |                              |                            |                                        |                                           |                                       |                                |                                              |                                   |
| Never                          | 1.00                         | 1.00                       | 1.00                                   | 1.00                                      | 1.00                                  | 1.00                           | 1.00                                         | 1.00                              |
| Former                         | -0.01 (-0.03-0.02)           | 0.03 (0.01-0.06)           | -0.05 (-0.08- -0.02)                   | 0.00 (-0.03-0.03)                         | 0.00 (-0.03-0.02)                     | 0.00 (-0.03-0.02)              | 0.00 (-0.02-0.03)                            | 0.01 (-0.02-0.03)                 |
| Current                        | 0.00 (-0.03-0.03)            | 0.01 (-0.02-0.04)          | 0.00 (-0.03-0.04)                      | -0.01 (-0.05-0.02)                        | -0.02 (-0.06-0.01)                    | -0.02 (-0.05-0.01)             | -0.02 (-0.05-0.01)                           | 0.00 (-0.03-0.03)                 |
|                                | <i>White blood cells</i>     | <i>Hemoglobin</i>          | <i>Platelets</i>                       |                                           |                                       |                                |                                              |                                   |
|                                | Mean (95% CI)                | Mean (95% CI)              | Mean (95% CI)                          |                                           |                                       |                                |                                              |                                   |
| Timing of exposure             |                              |                            |                                        |                                           |                                       |                                |                                              |                                   |
| Never                          | 1.00                         | 1.00                       | 1.00                                   |                                           |                                       |                                |                                              |                                   |
| Former                         | 0.01 (-0.03-0.04)            | 0.00 (-0.03-0.02)          | 0.00 (-0.03-0.03)                      |                                           |                                       |                                |                                              |                                   |
| Current                        | 0.04 (0.00-0.07)             | -0.01 (-0.04-0.01)         | 0.00 (-0.03-0.04)                      |                                           |                                       |                                |                                              |                                   |
