# Supplementary figures and images for: Long working hours, anthropometry, lung function, blood pressure and blood-based biomarkers: cross-sectional findings from the CONSTANCES study
Source: PubMed Central journal article supplement — J Epidemiol Community Health. 2018 Oct 16;73(2):130–5. doi: 10.1136/jech-2018-210943 (PMC6352398; doi:10.1136/jech-2018-210943), 2018-10-16

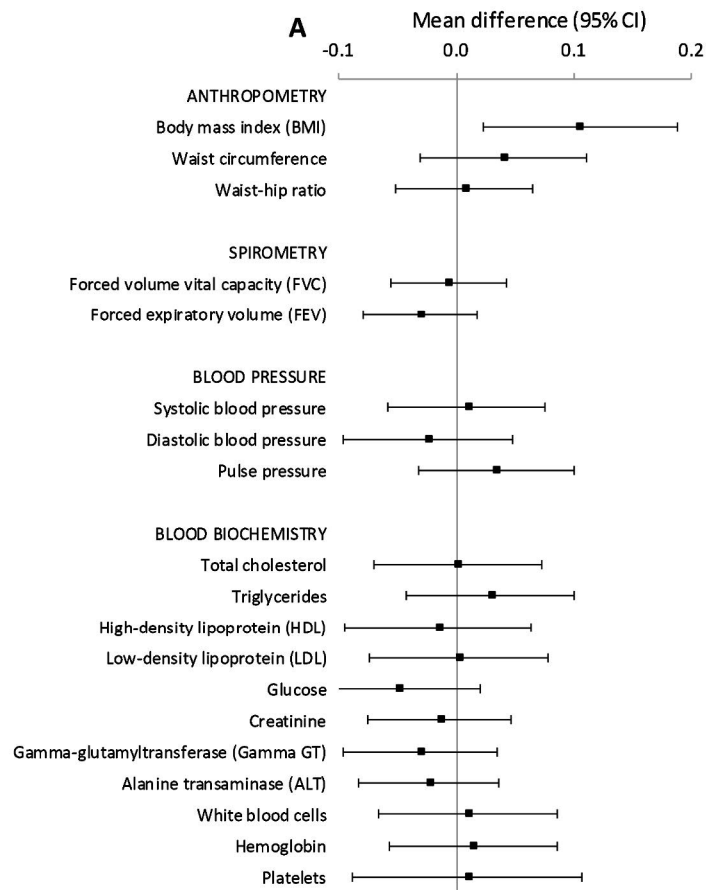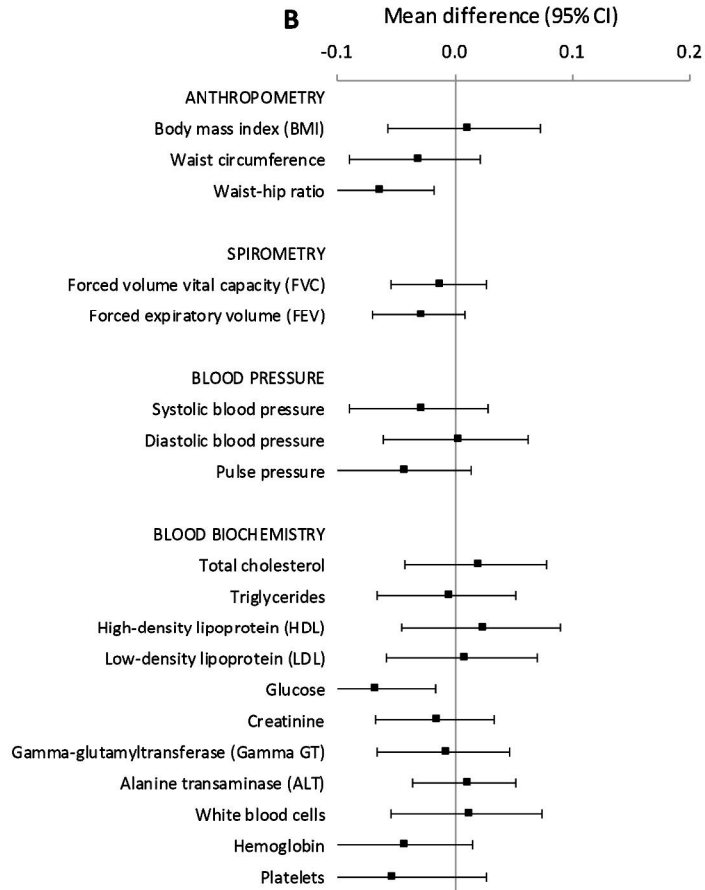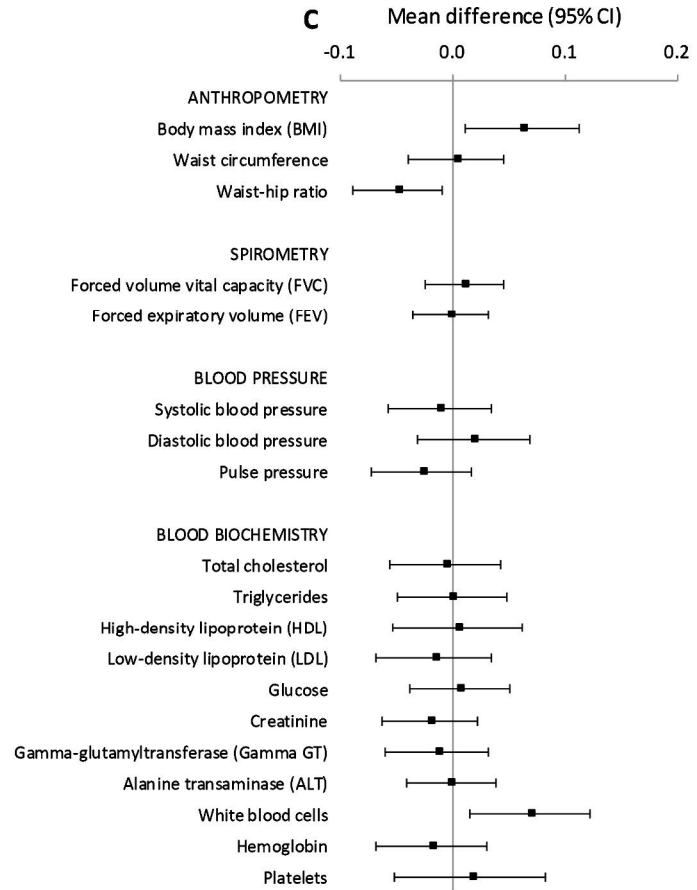

Supplement: jech-2018-210943supp006.pdf [file jech-2018-210943supp006.pdf]
